# Supplementary material for: A high-resolution history of the South American Monsoon from Last Glacial Maximum to the Holocene
Source: PubMed Central journal article supplement (PMC5345026; doi:10.1038/srep44267), 2017-03-10
Supplement: srep44267-s1.pdf [file srep44267-s1.pdf]

Supplementary Information for

**A high-resolution history of the South American Monsoon from Last  
Glacial Maximum to the Holocene**

Valdir F. Novello<sup>1\*</sup>, Francisco W. Cruz<sup>1</sup>, Mathias Vuille<sup>2</sup>, Nicolás M. Stríkis<sup>3</sup>, R. Lawrence  
Edwards<sup>4</sup>, Hai Cheng<sup>4,5</sup>, Suellyn Emerick<sup>1</sup>, Marcos S. de Paula<sup>1</sup>, Xianglei Li<sup>5</sup>, Eline de S.  
Barreto<sup>1</sup>, Ivo Karmann<sup>1</sup>, Roberto V. Santos<sup>6</sup>

<sup>1</sup>Instituto de Geociências, Universidade de São Paulo, São Paulo 05508-090, Brazil.

<sup>2</sup>Department of Atmospheric and Environmental Sciences, University at Albany, Albany, New  
York 12222, USA. <sup>3</sup>Departamento de Geoquímica, Universidade Federal Fluminense, Niterói,  
Rio de Janeiro 24220-900, Brazil. <sup>4</sup>Department of Earth Sciences, University of Minnesota,  
Minneapolis, Minnesota 55455, USA. <sup>5</sup>Institute of Global Environmental Change, Xi'an  
Jiaotong University, Xi'an 710049, China. <sup>6</sup>Instituto de Geociências, Universidade de Brasília,  
Brasília, Brazil.

(\*) Corresponding author: Valdir Felipe Novello, Instituto de Geociências, Universidade de São  
Paulo, Rua do Lago, 562, CEP 05508-080, São Paulo, Brazil. (vfnovello@gmail.com).

**This document includes:**

**Figures S1 to S7**

**Table S1 and S2**

**References**

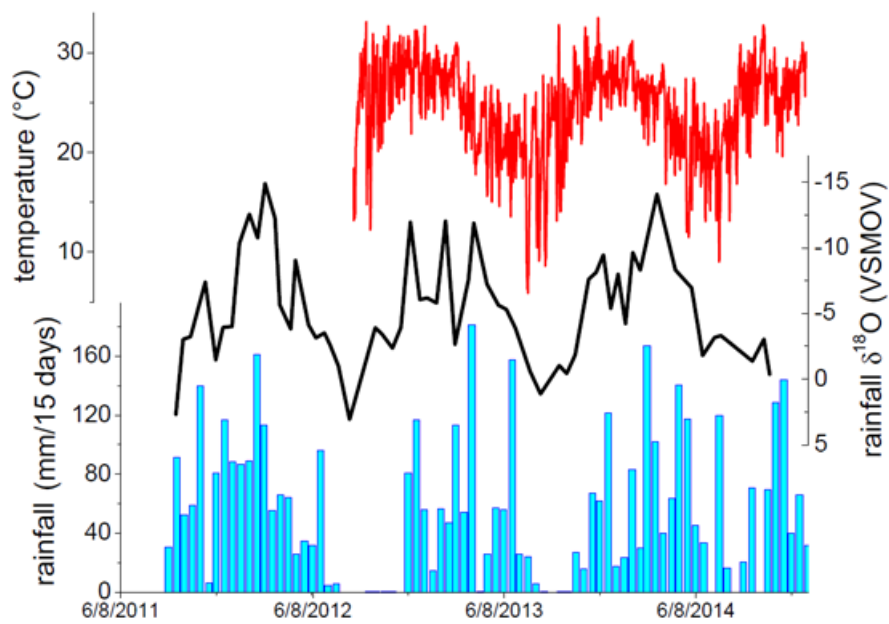

**Figure S1.** Comparison between biweekly (15 day) accumulated precipitation (blue), rainfall  $\delta^{18}\text{O}$  (black) and daily mean air temperature (red). Sampling site located close to Jaraguá cave. Note that scale for rainfall  $\delta^{18}\text{O}$  is inverted.

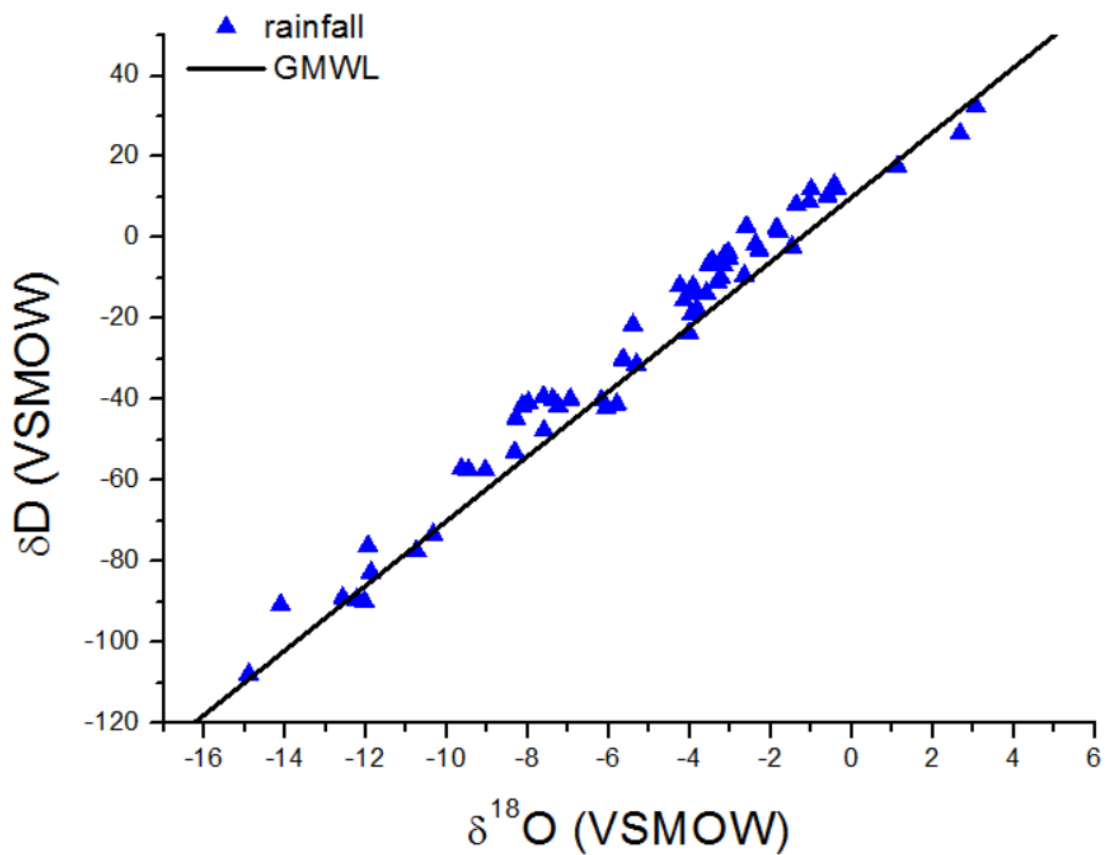

**Figure S2.** Relationship between  $\delta\text{D}$  and  $\delta^{18}\text{O}$  of rainfall at sampling site located close to Jaraguá cave, plotted alongside the Global Meteoric Water Line<sup>1</sup>.

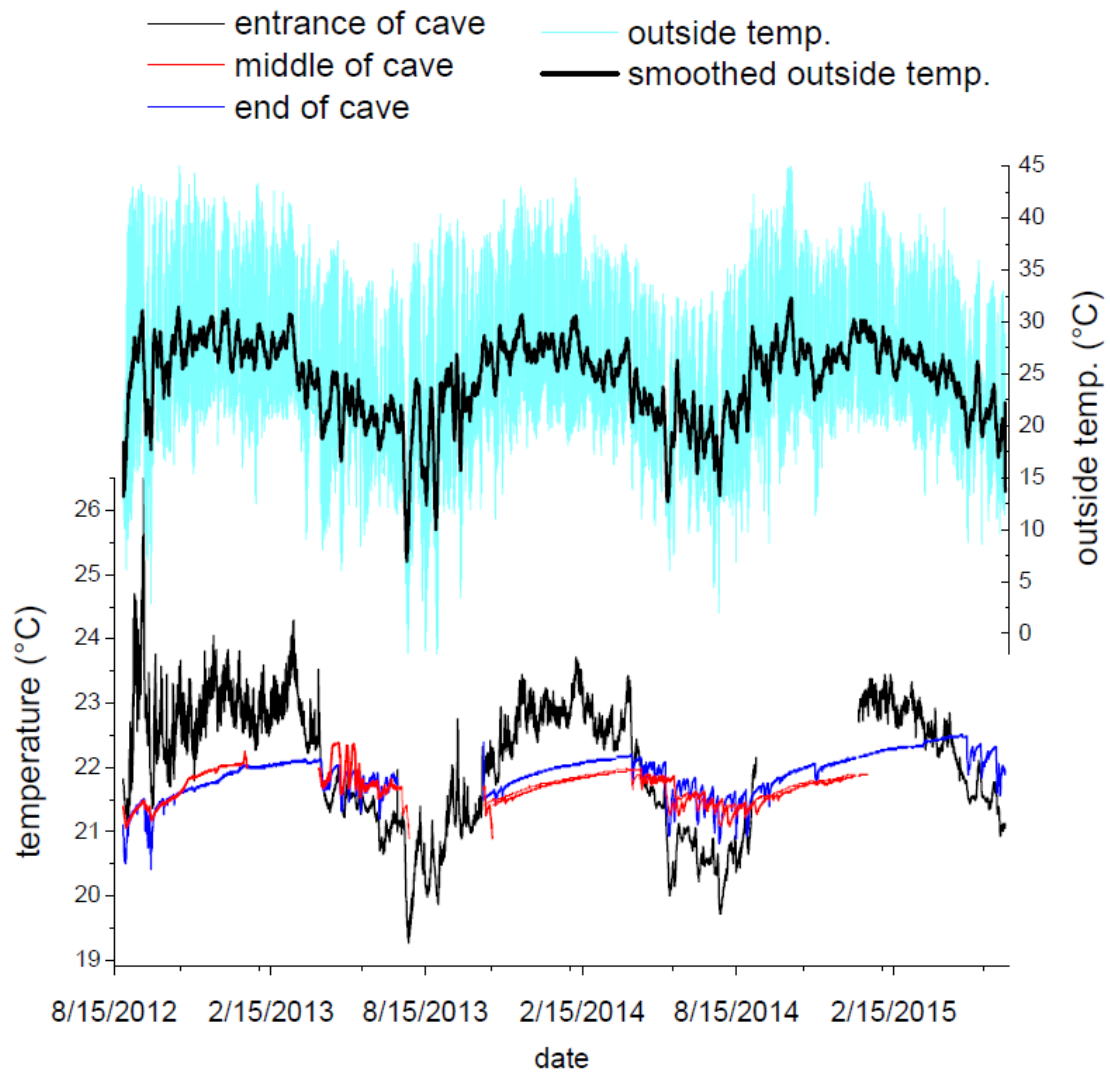

**Figure S3.** Bottom: Air temperature monitored at the entrance (black), middle (red) and end (blue) of Jaraguá cave. Top: Outside air temperature hourly (light blue) and the smoothed average (black).

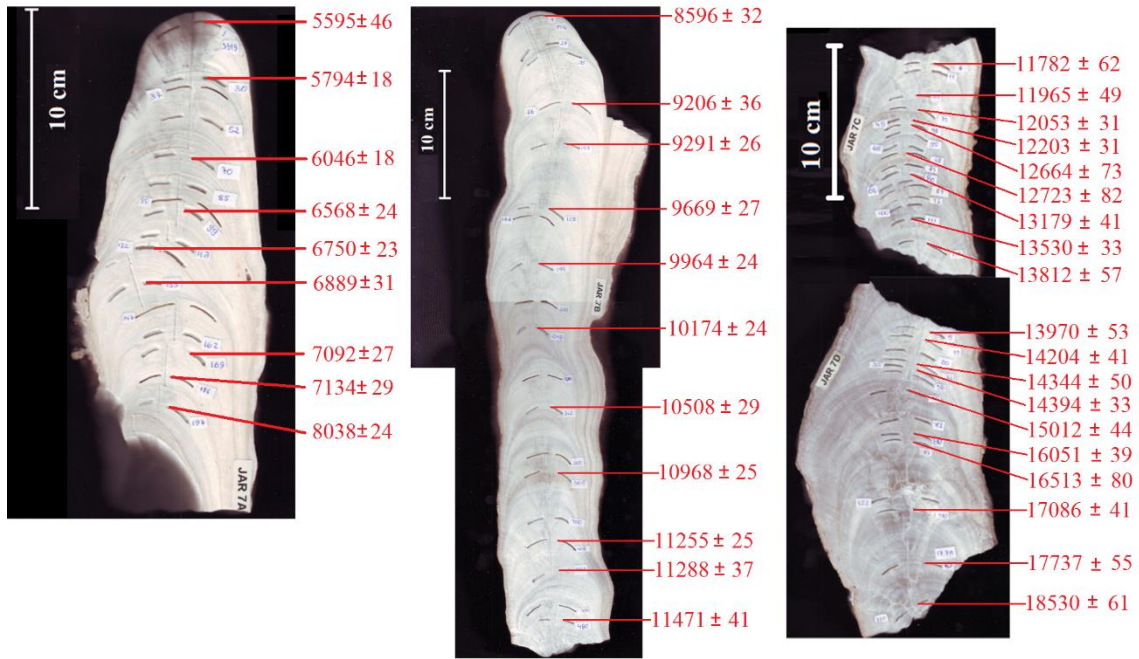

**Figure S4.** Stalagmite JAR7 with the position of U/Th ages.

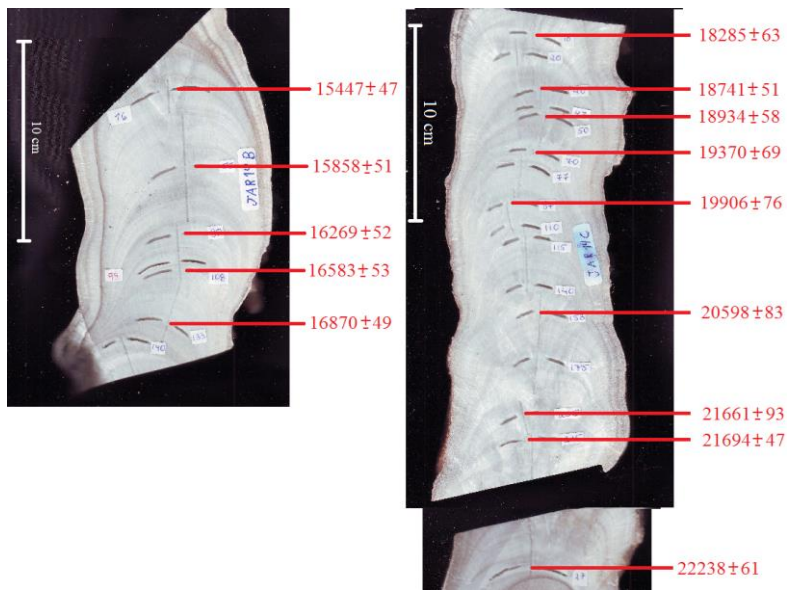

**Figure S5.** Stalagmite JAR14 with the position of U/Th ages.

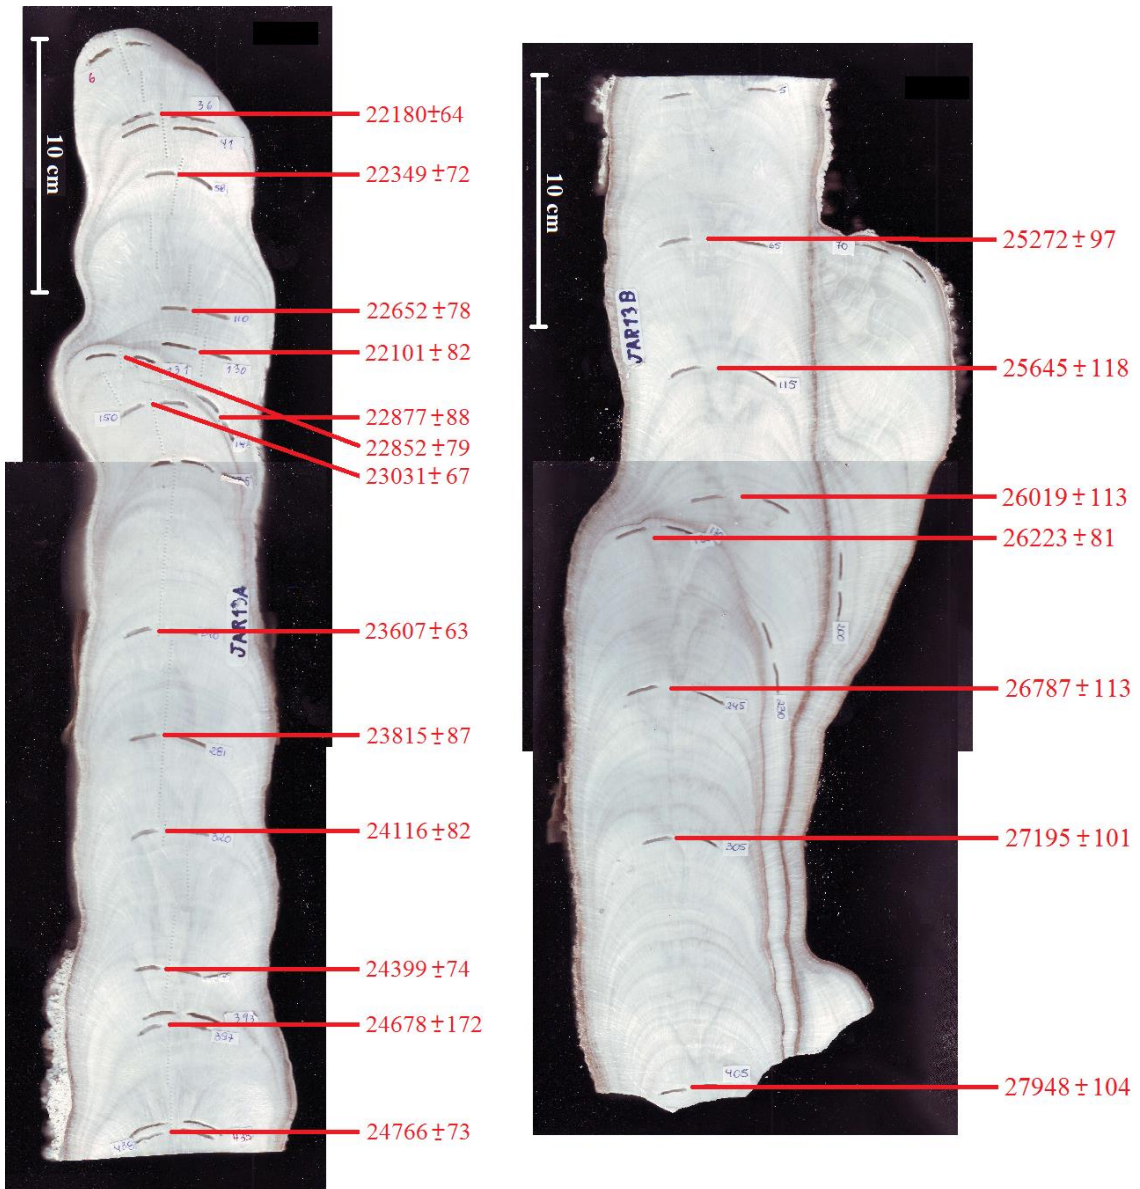

**Figure S6.** Stalagmite JAR13 with the position of U/Th ages.

Table S1

| Sample name | positions in relationship to top (mm) | <sup>238</sup> U (ppb) | <sup>232</sup> Th (ppt) | <sup>230</sup> Th / <sup>232</sup> Th (atomic $\times 10^{-6}$ ) | d <sup>234</sup> U* (measured) | <sup>230</sup> Th / <sup>238</sup> U (activity) | <sup>230</sup> Th Age (yr) (uncorrected) | <sup>230</sup> Th Age (yr) (corrected) | d <sup>234</sup> U <sub>Initial</sub> ** (corrected) |               |
|-------------|---------------------------------------|------------------------|-------------------------|------------------------------------------------------------------|--------------------------------|-------------------------------------------------|------------------------------------------|----------------------------------------|------------------------------------------------------|---------------|
| JAR7A-5     | 4.9                                   | 1013 ± 5               | 184 ± 5                 | 5300 ± 134                                                       | 167 ± 5                        | 0.05854 ± 0.00038                               | 5,600 ± 46                               | <b>5,595 ± 46</b>                      | 170 ± 6                                              |               |
| JAR7A-30    | 37.7                                  | 3779 ± 9               | 307 ± 6                 | 12500 ± 256                                                      | 186.9 ± 1.7                    | 0.0615 ± 0.0002                                 | 5796 ± 18                                | <b>5794 ± 18</b>                       | 190 ± 2                                              |               |
| JAR7A-70    | 73.4                                  | 6526 ± 15              | 107 ± 3                 | 64087 ± 1493                                                     | 185.4 ± 1.5                    | 0.0640 ± 0.0002                                 | 6046 ± 18                                | <b>6046 ± 18</b>                       | 189 ± 2                                              |               |
| JAR7A-99    | 101.2                                 | 7161 ± 22              | 399 ± 8                 | 21163 ± 434                                                      | 220.9 ± 1.7                    | 0.0715 ± 0.0002                                 | 6570 ± 24                                | <b>6568 ± 24</b>                       | 225 ± 2                                              |               |
| JAR7A-122   | 121.6                                 | 4062 ± 10              | 468 ± 9                 | 10369 ± 210                                                      | 204.7 ± 1.7                    | 0.0725 ± 0.0002                                 | 6753 ± 23                                | <b>6750 ± 23</b>                       | 209 ± 2                                              |               |
| JAR7A-135   | 139.8                                 | 6899 ± 25              | 238 ± 5                 | 34517 ± 721                                                      | 176.9 ± 2.0                    | 0.0722 ± 0.0003                                 | 6889 ± 31                                | <b>6889 ± 31</b>                       | 180 ± 2                                              |               |
| JAR7A-169   | 175.6                                 | 6810 ± 22              | 191 ± 4                 | 44296 ± 929                                                      | 196.9 ± 1.8                    | 0.0755 ± 0.0003                                 | 7092 ± 27                                | <b>7092 ± 27</b>                       | 201 ± 2                                              |               |
| JAR7A-185   | 188.9                                 | 2426 ± 7.0             | 109 ± 3                 | 27945 ± 817                                                      | 205.3 ± 2.0                    | 0.0765 ± 0.0003                                 | 7135 ± 29                                | <b>7133 ± 29</b>                       | 209 ± 2                                              |               |
| JAR7A-197   | 203.8                                 | 4102 ± 9               | 212 ± 4                 | 26741 ± 551                                                      | 178.1 ± 1.5                    | 0.0839 ± 0.0002                                 | 8039 ± 24                                | <b>8038 ± 24</b>                       | 182 ± 2                                              |               |
| JAR7B-4     | 324.3                                 | 2195 ± 4.7             | 732 ± 15                | 4600 ± 93                                                        | 224.2 ± 2.2                    | 0.0931 ± 0.0003                                 | 8604 ± 31                                | <b>8596 ± 32</b>                       | 230 ± 2                                              |               |
| JAR7B-74    | 391.3                                 | 2183 ± 4               | 3184 ± 425              | 1142 ± 152                                                       | 239.8 ± 1.6                    | 0.1010 ± 0.0002                                 | 9240 ± 27                                | <b>9206 ± 36</b>                       | 246 ± 2                                              |               |
| JAR7B-103   | 426.6                                 | 3217 ± 6               | 394 ± 8                 | 13188 ± 269                                                      | 195.5 ± 1.6                    | 0.0979 ± 0.0002                                 | 9294 ± 26                                | <b>9291 ± 26</b>                       | 201 ± 2                                              |               |
| JAR7B-155   | 478                                   | 2532 ± 5               | 373 ± 8                 | 11765 ± 239                                                      | 235.2 ± 1.6                    | 0.1051 ± 0.0003                                 | 9672 ± 27                                | <b>9669 ± 27</b>                       | 242 ± 2                                              |               |
| JAR7B-199   | 522.6                                 | 3233 ± 5               | 577 ± 12                | 10020 ± 204                                                      | 237.9 ± 1.5                    | 0.1084 ± 0.0002                                 | 9968 ± 24                                | <b>9964 ± 24</b>                       | 245 ± 2                                              |               |
| JAR7B-248   | 572.9                                 | 1924 ± 4               | 574 ± 12                | 6089 ± 123                                                       | 233.2 ± 1.7                    | 0.1102 ± 0.0003                                 | 10181 ± 28                               | <b>10174 ± 29</b>                      | 240 ± 2                                              |               |
| JAR7B-312   | 637                                   | 1947 ± 4               | 527 ± 11                | 7056 ± 143                                                       | 257.3 ± 1.6                    | 0.1159 ± 0.0003                                 | 10514 ± 29                               | <b>10508 ± 29</b>                      | 265 ± 2                                              |               |
| JAR7B-365   | 684.7                                 | 1907 ± 3               | 231 ± 5                 | 16353 ± 338                                                      | 250.1 ± 1.5                    | 0.1200 ± 0.0002                                 | 10971 ± 25                               | <b>10968 ± 25</b>                      | 258 ± 2                                              |               |
| JAR7B-420   | 740                                   | 1270 ± 2               | 140 ± 3                 | 19128 ± 395                                                      | 296.6 ± 1.5                    | 0.1276 ± 0.0002                                 | 11258 ± 25                               | <b>11255 ± 25</b>                      | 306 ± 2                                              |               |
| JAR7B-422   | 760.6                                 | 1392 ± 3               | 609 ± 12                | 4807 ± 99                                                        | 289.9 ± 1.7                    | 0.1274 ± 0.0003                                 | 11298 ± 36                               | <b>11288 ± 37</b>                      | 299 ± 2                                              |               |
| JAR7B-470   | 798.4                                 | 1057 ± 2.1             | 485 ± 10                | 4774 ± 97                                                        | 322.9 ± 2.1                    | 0.1327 ± 0.0004                                 | 11481 ± 41                               | <b>11471 ± 41</b>                      | 334 ± 2                                              |               |
| JAR7C-6     | 842.4                                 | 3148 ± 3               | 9678 ± 194              | 710 ± 14                                                         | 280.4 ± 1.3                    | 0.1323 ± 0.0004                                 | 11851 ± 38                               | <b>11782 ± 62</b>                      | 290 ± 1                                              |               |
| JAR7C-33    | 864                                   | 2303 ± 5               | 431 ± 9                 | 11945 ± 254                                                      | 300.0 ± 2.1                    | 0.1357 ± 0.0005                                 | 11969 ± 49                               | <b>11965 ± 49</b>                      | 310 ± 2                                              |               |
| JAR7C-35    | 873.6                                 | 3032 ± 3               | 768 ± 16                | 8828 ± 190                                                       | 291.0 ± 1.5                    | 0.1357 ± 0.0003                                 | 12059 ± 31                               | <b>12053 ± 31</b>                      | 301 ± 2                                              |               |
| JAR7C-45    | 880.5                                 | 1533 ± 3               | 375 ± 8                 | 9336 ± 189                                                       | 301.8 ± 1.6                    | 0.1384 ± 0.0003                                 | 12209 ± 31                               | <b>12203 ± 31</b>                      | 312 ± 2                                              |               |
| JAR7C-48    | 883.8                                 | 148.7 ± 0.1            | 52 ± 2                  | 6729 ± 202                                                       | 306.2 ± 1.6                    | 0.1439 ± 0.0008                                 | 12672 ± 73                               | <b>12664 ± 73</b>                      | 317 ± 2                                              | discarded age |
| JAR7C-65    | 897.6                                 | 1139 ± 2               | 130 ± 3                 | 20486 ± 446                                                      | 304.2 ± 1.5                    | 0.1416 ± 0.0003                                 | 12483 ± 31                               | <b>12481 ± 31</b>                      | 315 ± 2                                              |               |
| JAR7C-68    | 903                                   | 103.8 ± 0.1            | 57 ± 1                  | 4328 ± 105                                                       | 302.0 ± 2.0                    | 0.1441 ± 0.0008                                 | 12735 ± 82                               | <b>12723 ± 82</b>                      | 313 ± 2                                              |               |
| JAR7C-80    | 916.6                                 | 1310 ± 2               | 272 ± 6                 | 11194 ± 236                                                      | 261.4 ± 1.6                    | 0.1411 ± 0.0004                                 | 12883 ± 40                               | <b>12879 ± 40</b>                      | 271 ± 2                                              |               |
| JAR7C-89    | 924.6                                 | 88.8 ± 0.1             | 68 ± 2                  | 3214 ± 83                                                        | 265.3 ± 1.6                    | 0.1492 ± 0.0011                                 | 13626 ± 106                              | <b>13608 ± 107</b>                     | 276 ± 2                                              | discarded age |
| JAR7C-100   | 927.6                                 | 1413 ± 3               | 256 ± 5                 | 13002 ± 277                                                      | 250.0 ± 1.9                    | 0.1429 ± 0.0004                                 | 13183 ± 41                               | <b>13179 ± 41</b>                      | 259 ± 2                                              |               |
| JAR7C-111   | 946.9                                 | 977 ± 1                | 234 ± 5                 | 10129 ± 208                                                      | 257.0 ± 1.5                    | 0.1473 ± 0.0003                                 | 13535 ± 33                               | <b>13530 ± 33</b>                      | 267 ± 2                                              |               |
| JAR7C-127   | 1106.9                                | 524 ± 0.7              | 726 ± 15                | 1792 ± 37                                                        | 258.9 ± 1.7                    | 0.1507 ± 0.0005                                 | 13842 ± 53                               | <b>13810 ± 57</b>                      | 269 ± 2                                              |               |
| JAR7D-5     | 989                                   | 2079 ± 4               | 521 ± 11                | 10017 ± 210                                                      | 261.7 ± 1.8                    | 0.1523 ± 0.0005                                 | 13970 ± 53                               | <b>13964 ± 53</b>                      | 272 ± 2                                              |               |
| JAR7D-11    | 992.4                                 | 2041 ± 2               | 1336 ± 27               | 3896 ± 80                                                        | 260.0 ± 1.3                    | 0.1547 ± 0.0004                                 | 14219 ± 40                               | <b>14204 ± 41</b>                      | 271 ± 1                                              |               |
| JAR7D-32    | 1009.9                                | 2620 ± 2               | 1483 ± 31               | 4477 ± 94                                                        | 240.7 ± 1.2                    | 0.1537 ± 0.0005                                 | 14357 ± 49                               | <b>14344 ± 50</b>                      | 251 ± 1                                              |               |
| JAR7D-35    | 1013.4                                | 1218 ± 2               | 472 ± 10                | 6592 ± 133                                                       | 247.2 ± 1.4                    | 0.1549 ± 0.0003                                 | 14403 ± 33                               | <b>14394 ± 33</b>                      | 257 ± 1                                              |               |
| JAR7D-50    | 1027.8                                | 2139 ± 4               | 567 ± 11                | 9925 ± 201                                                       | 235.8 ± 1.6                    | 0.1596 ± 0.0004                                 | 15018 ± 44                               | <b>15012 ± 44</b>                      | 246 ± 2                                              |               |
| JAR7D-80    | 1056.6                                | 1829 ± 3               | 336 ± 7                 | 15528 ± 316                                                      | 257.8 ± 1.4                    | 0.1730 ± 0.0003                                 | 16055 ± 39                               | <b>16051 ± 39</b>                      | 270 ± 1                                              |               |
| JAR7D-85    | 1061.9                                | 172.8 ± 0.2            | 40 ± 1                  | 12642 ± 410                                                      | 246.8 ± 1.4                    | 0.1761 ± 0.0008                                 | 16518 ± 80                               | <b>16513 ± 80</b>                      | 259 ± 2                                              |               |
| JAR7D-122   | 1097.4                                | 2956 ± 7               | 7894 ± 9857             | 1041 ± 1300                                                      | 269.9 ± 1.9                    | 0.1686 ± 0.0062                                 | 15458 ± 611                              | <b>15397 ± 617</b>                     | 282 ± 2                                              | discarded age |
| JAR7D-130   | 1106.9                                | 3705 ± 3               | 1542 ± 32               | 7346 ± 152                                                       | 271.2 ± 1.3                    | 0.1854 ± 0.0004                                 | 17095 ± 40                               | <b>17086 ± 41</b>                      | 285 ± 1                                              |               |
| JAR7D-167   | 1142                                  | 2494 ± 4.5             | 555 ± 11                | 14085 ± 285                                                      | 14085 ± 285                    | 259.1 ± 1.8                                     | 17742 ± 55                               | <b>17737 ± 55</b>                      | 272 ± 2                                              |               |
| JAR7D-200   | 1173.4                                | 2681 ± 5               | 499 ± 12                | 17405 ± 409                                                      | 17405 ± 409                    | 0.1964 ± 0.0005                                 | 18534 ± 61                               | <b>18530 ± 61</b>                      | 263 ± 2                                              |               |

| Stalagmite JAR14 (14 analysis) |                                                               |                        |                         |                                                                   |                                |                                                 |                                          |                                        |                                                      |
|--------------------------------|---------------------------------------------------------------|------------------------|-------------------------|-------------------------------------------------------------------|--------------------------------|-------------------------------------------------|------------------------------------------|----------------------------------------|------------------------------------------------------|
| Sample name                    | positions in relationship to the first sampled point top (mm) | <sup>238</sup> U (ppb) | <sup>232</sup> Th (ppt) | <sup>230</sup> Th / <sup>232</sup> Th (atomic x10 <sup>-6</sup> ) | d <sup>234</sup> U* (measured) | <sup>230</sup> Th / <sup>238</sup> U (activity) | <sup>230</sup> Th Age (yr) (uncorrected) | <sup>230</sup> Th Age (yr) (corrected) | d <sup>234</sup> U <sub>initial</sub> ** (corrected) |
| JAR14B-16                      | 5.5                                                           | 3970.3 ±5.6            | 371 ±9                  | 28077 ±712                                                        | 199.8 ±1.8                     | 0.1591 ±0.0003                                  | 15449 ±41                                | <b>15447 ±41</b>                       | 209 ±2                                               |
| JAR14B-55                      | 45                                                            | 3223 ±8                | 371 ±7                  | 23680 ±480                                                        | 215.3 ±1.6                     | 0.1652 ±0.0004                                  | 15861 ±51                                | <b>15858 ±51</b>                       | 225 ±2                                               |
| JAR14B-90                      | 78                                                            | 2301 ±5                | 3055 ±61                | 2159 ±43                                                          | 244.3 ±1.5                     | 0.1738 ±0.0004                                  | 16327 ±47                                | <b>16296 ±52</b>                       | 256 ±2                                               |
| JAR14B-108                     | 107.8                                                         | 1978 ±4                | 483 ±10                 | 11675 ±245                                                        | 220.9 ±1.7                     | 0.1730 ±0.0005                                  | 16589 ±53                                | <b>16583 ±53</b>                       | 231 ±2                                               |
| JAR14B-133                     | 131.2                                                         | 1657 ±3                | 133 ±3                  | 35937 ±819                                                        | 214.0 ±1.5                     | 0.1747 ±0.0004                                  | 16872 ±49                                | <b>16870 ±49</b>                       | 224 ±2                                               |
| JAR14C-10                      | 141.7                                                         | 2228 ±5                | 994 ±20                 | 7139 ±145                                                         | 244.3 ±1.9                     | 0.1932 ±0.0005                                  | 18296 ±63                                | <b>18285 ±63</b>                       | 257 ±2                                               |
| JAR14C-40                      | 170.7                                                         | 1480 ±2                | 525 ±11                 | 9828 ±200                                                         | 329.1 ±1.6                     | 0.2113 ±0.0005                                  | 18749 ±51                                | <b>18741 ±51</b>                       | 347 ±2                                               |
| JAR14C-50                      | 182.7                                                         | 1648 ±3                | 169 ±4                  | 33098 ±724                                                        | 287.4 ±1.8                     | 0.2064 ±0.0005                                  | 18936 ±58                                | <b>18934 ±58</b>                       | 303 ±2                                               |
| JAR14C-70                      | 202.7                                                         | 1825 ±4                | 406 ±8                  | 15180 ±311                                                        | 250.6 ±2.2                     | 0.2047 ±0.0006                                  | 19375 ±69                                | <b>19370 ±69</b>                       | 265 ±2                                               |
| JAR14C-97                      | 229.7                                                         | 1484 ±3                | 213 ±5                  | 23809 ±528                                                        | 236.2 ±1.8                     | 0.2074 ±0.0007                                  | 19909 ±76                                | <b>19906 ±76</b>                       | 250 ±2                                               |
| JAR14C-153                     | 286.7                                                         | 1778 ±4                | 285 ±6                  | 21865 ±457                                                        | 229.6 ±2.5                     | 0.2128 ±0.0006                                  | 20602 ±83                                | <b>20598 ±83</b>                       | 243 ±3                                               |
| JAR14C-205                     | 336.7                                                         | 2877 ±6                | 1280 ±26                | 8281 ±171                                                         | 232.5 ±1.7                     | 0.2234 ±0.0008                                  | 21672 ±92                                | <b>21661 ±93</b>                       | 247 ±2                                               |
| JAR14C-215                     | 347.2                                                         | 2208 ±3                | 528 ±11                 | 15553 ±314                                                        | 242.0 ±1.3                     | 0.2254 ±0.0004                                  | 21700 ±47                                | <b>21694 ±47</b>                       | 257 ±1                                               |
| JAR14D-27                      | 373.7                                                         | 3177.7 ±4.6            | 837 ±18                 | 14131 ±302                                                        | 212.8 ±1.7                     | 0.2258 ±0.0005                                  | 22333 ±60                                | <b>22327 ±61</b>                       | 227 ±2                                               |

| Stalagmite JAR13 (23 analysis) |                                                               |                        |                         |                                                                   |                                |                                                 |                                          |                                        |                                                      |
|--------------------------------|---------------------------------------------------------------|------------------------|-------------------------|-------------------------------------------------------------------|--------------------------------|-------------------------------------------------|------------------------------------------|----------------------------------------|------------------------------------------------------|
| Sample name                    | positions in relationship to the first sampled point top (mm) | <sup>238</sup> U (ppb) | <sup>232</sup> Th (ppt) | <sup>230</sup> Th / <sup>232</sup> Th (atomic x10 <sup>-6</sup> ) | d <sup>234</sup> U* (measured) | <sup>230</sup> Th / <sup>238</sup> U (activity) | <sup>230</sup> Th Age (yr) (uncorrected) | <sup>230</sup> Th Age (yr) (corrected) | d <sup>234</sup> U <sub>initial</sub> ** (corrected) |
| JAR13A-36                      | 37.5                                                          | 4438.3 ±7.5            | 155 ±7                  | 94394 ±4053                                                       | 81.7 ±1.6                      | 0.1996 ±0.0004                                  | 22180 ±64                                | <b>22180 ±64</b>                       | 87 ±2                                                |
| JAR13A-58                      | 61.5                                                          | 3215 ±7                | 1136 ±23                | 9530 ±192                                                         | 99.2 ±1.5                      | 0.2043 ±0.0005                                  | 22359 ±72                                | <b>22349 ±72</b>                       | 106 ±2                                               |
| JAR13A-110                     | 120                                                           | 4582 ±12               | 211 ±4                  | 73507 ±1532                                                       | 90.7 ±1.5                      | 0.2051 ±0.0006                                  | 22653 ±78                                | <b>22652 ±78</b>                       | 97 ±2                                                |
| JAR13A-130                     | 136.5                                                         | 5739 ±12               | 648 ±14                 | 29171.8 ±652.3                                                    | 86.5 ±1.8                      | 0.1998 ±0.0006                                  | 22105 ±82                                | <b>22101 ±82</b>                       | 92 ±2                                                |
| JAR13A-145                     | 154.5                                                         | 3461 ±9                | 606 ±13                 | 19756 ±410                                                        | 105.3 ±1.7                     | 0.2099 ±0.0007                                  | 22882 ±88                                | <b>22877 ±88</b>                       | 112 ±2                                               |
| JAR13A-131                     | 160.04                                                        | 2635 ±3.4              | 317 ±9                  | 28513 ±794                                                        | 95.5 ±1.5                      | 0.2077 ±0.0006                                  | 22855 ±79                                | <b>22852 ±79</b>                       | 102 ±2                                               |
| JAR13A-150                     | 184                                                           | 3486 ±7                | 407 ±8                  | 29430 ±604                                                        | 90.9 ±1.3                      | 0.2083 ±0.0005                                  | 23034 ±67                                | <b>23031 ±67</b>                       | 97 ±1                                                |
| JAR13A-240                     | 276.84                                                        | 2553 ±5                | 287 ±6                  | 31212 ±643                                                        | 89.0 ±1.3                      | 0.2126 ±0.0004                                  | 23610 ±63                                | <b>23607 ±63</b>                       | 95 ±1                                                |
| JAR13A-281                     | 318.4                                                         | 3699 ±9                | 189 ±4                  | 69157 ±1469                                                       | 89.8 ±1.9                      | 0.2144 ±0.0006                                  | 23816 ±87                                | <b>23815 ±87</b>                       | 96 ±2                                                |
| JAR13A-320                     | 356.8                                                         | 3602 ±9                | 188 ±4                  | 68655 ±1430                                                       | 95.1 ±1.5                      | 0.2179 ±0.0006                                  | 24117 ±82                                | <b>24116 ±82</b>                       | 102 ±2                                               |
| JAR13A-375                     | 411.2                                                         | 4316 ±8                | 596 ±12                 | 26279 ±534                                                        | 94.4 ±1.6                      | 0.2201 ±0.0005                                  | 24402 ±74                                | <b>24399 ±74</b>                       | 101 ±2                                               |
| JAR13A-397                     | 435.2                                                         | 3456 ±10               | 267 ±15                 | 46748 ±2653                                                       | 78.5 ±1.8                      | 0.2190 ±0.0013                                  | 24680 ±172                               | <b>24678 ±172</b>                      | 84 ±2                                                |
| JAR13A-438                     | 322.4                                                         | 3320 ±7                | 262 ±5                  | 46299 ±956                                                        | 87.7 ±1.4                      | 0.2216 ±0.0005                                  | 24768 ±73                                | <b>24766 ±73</b>                       | 94 ±1                                                |
| JAR13B-5                       | 495.4                                                         | 4245 ±13               | 623 ±13                 | 25088 ±512                                                        | 85.2 ±1.8                      | 0.2231 ±0.0007                                  | 25024 ±104                               | <b>25020 ±104</b>                      | 91 ±2                                                |
| JAR13B-65                      | 554.6                                                         | 4090 ±12               | 264 ±6                  | 57768 ±1215                                                       | 90.3 ±1.8                      | 0.2262 ±0.0007                                  | 25274 ±105                               | <b>25272 ±105</b>                      | 97 ±2                                                |
| JAR13B-115                     | 605.8                                                         | 3896 ±13               | 290 ±6                  | 50979 ±1061                                                       | 96.4 ±2.1                      | 0.2305 ±0.0008                                  | 25647 ±118                               | <b>25645 ±118</b>                      | 104 ±2                                               |
| JAR13B-170                     | 658.6                                                         | 3912 ±12               | 265 ±6                  | 56852 ±1190                                                       | 94.9 ±1.9                      | 0.2332 ±0.0008                                  | 26021 ±113                               | <b>26019 ±113</b>                      | 102 ±2                                               |
| JAR13B-174                     | 209.6                                                         | 3897.1 ±7.5            | 125 ±6                  | 117741 ±6033                                                      | 87.3 ±1.9                      | 0.2299 ±0.0006                                  | 25822 ±88                                | <b>25821 ±88</b>                       | 94 ±2                                                |
| JAR13B-183                     | 710.9                                                         | 4170.9 ±7.2            | 222 ±7                  | 71865 ±2379                                                       | 80.2 ±1.7                      | 0.2315 ±0.0005                                  | 26224 ±81                                | <b>26223 ±81</b>                       | 86 ±2                                                |
| JAR13B-245                     | 772.4                                                         | 3983 ±10               | 235 ±5                  | 66364 ±1345                                                       | 85.2 ±1.6                      | 0.2371 ±0.0007                                  | 26788 ±100                               | <b>26787 ±100</b>                      | 92 ±2                                                |
| JAR13B-305                     | 832.4                                                         | 4153 ±10               | 252 ±5                  | 64928 ±1315                                                       | 80.1 ±1.7                      | 0.2391 ±0.0007                                  | 27197 ±101                               | <b>27195 ±101</b>                      | 87 ±2                                                |
| JAR13B-338                     | 863.9                                                         | 3391.9 ±6.1            | 487 ±11                 | 27388.2 ±645.6                                                    | 81.1 ±1.9                      | 0.238465 ±0.00056                               | 27088 ±92                                | <b>27084 ±92</b>                       | 88 ±2                                                |
| JAR13B-405                     | 932.9                                                         | 3762 ±10               | 619 ±12                 | 24449 ±494                                                        | 76.1 ±1.8                      | 0.2440 ±0.0007                                  | 27953 ±104                               | <b>27948 ±104</b>                      | 82 ±2                                                |

$$\alpha_{\delta^{234}\text{U}} = ([^{234}\text{U}/^{238}\text{U}]_{\text{activity}} - 1) \times 1000.$$

$\beta_{\delta^{234}\text{U}_{\text{initial}}}$  corrected was calculated based on <sup>230</sup>Th age (T), i.e.,  $\delta^{234}\text{U}_{\text{initial}} = \delta^{234}\text{U}_{\text{measured}} \times e^{\lambda_{234} \times T}$ , and T is corrected age.

<sup>c</sup>  $[\frac{^{230}\text{Th}}{^{238}\text{U}}]_{\text{activity}} = 1 - e^{-\lambda_{230}T} + (\delta^{234}\text{U}_{\text{measured}}/1000)[\lambda_{230}/(\lambda_{230} - \lambda_{234})](1 - e^{-(\lambda_{230} - \lambda_{234})T})$ , where T is the age.

Decay constants are  $9.1577 \times 10^{-6} \text{ yr}^{-1}$  for <sup>230</sup>Th,  $2.8263 \times 10^{-6} \text{ yr}^{-1}$  for <sup>234</sup>U, and  $1.55125 \times 10^{-10} \text{ yr}^{-1}$  for <sup>238</sup>U (Cheng et al., 2000).

<sup>d</sup> The degree of detrital <sup>230</sup>Th contamination is indicated by the  $[\frac{^{230}\text{Th}}{^{232}\text{Th}}]$  atomic ratio instead of the activity ratio.

<sup>e</sup> Age corrections were calculated using an average crustal <sup>230</sup>Th/<sup>232</sup>Th atomic ratio of  $4.4 \times 10^{-6} \pm 2.2 \times 10^{-6}$ .

Those are the values for a material at secular equilibrium, with the crustal <sup>232</sup>Th/<sup>238</sup>U value of 3.8. The errors are arbitrarily assumed to be 50%.



| <b>sample name</b> | <b>Number of isotopic analyses</b> | <b>Number of U-Th ages</b> | <b>mean resolution (years)</b> | <b>Period covered (years BP*)</b> |
|--------------------|------------------------------------|----------------------------|--------------------------------|-----------------------------------|
| <b>JAR7</b>        | 1924                               | 43                         | 6.8                            | 5550 - 18660                      |
| <b>JAR14</b>       | 863                                | 14                         | 8                              | 15395 - 22370                     |
| <b>JAR13</b>       | 603                                | 23                         | 10                             | 21915 - 27970                     |

**Table S2.** Number of isotopic analyses and U-Th ages, resolution and period covered by the stalagmites that compose the JAR record. (\*) The year of 2014 (C.E) is considered the present year.

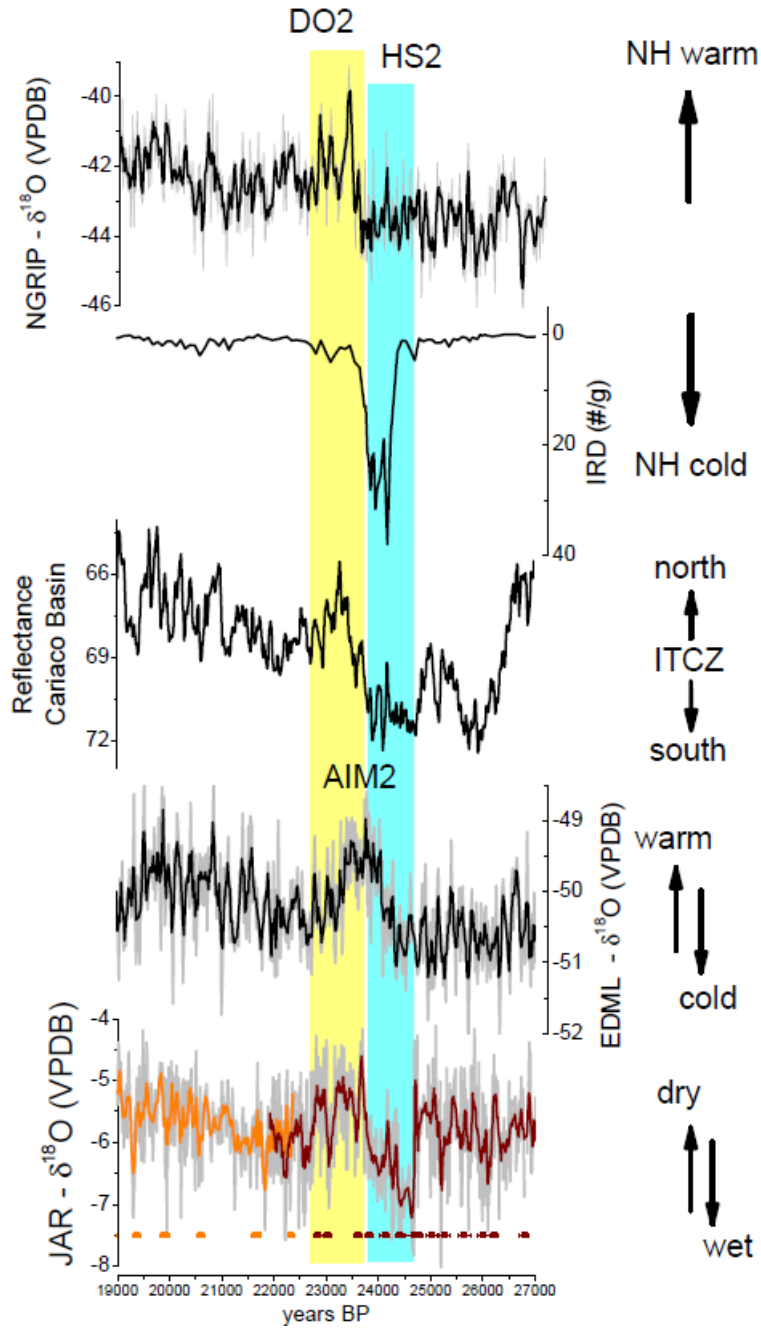

**Figure S7. Comparison of paleoclimate records documenting the AIM2 and HS2 events.** Detailed comparison of AIM2 recorded in JAR record (smooth line represents 9-point running mean) with EDML ice core (3-point running mean) from Antarctica<sup>2</sup>, reflectance of sedimentary core record from Cariaco Basin<sup>3</sup>, Ice-Rafted Debris (IRD) content in ocean sediment<sup>4</sup> and NGRIP  $\delta^{18}\text{O}$  ice core record (3-point running mean) from Greenland<sup>5</sup>.

## References

1. Dansgaard, W. Stable isotopes in precipitation. *Tellus* **16**, 436-468 (1964).
2. EPICA Community Members: Stable oxygen isotopes of ice core EDML, PANGAEA, doi:10.1594/PANGAEA.754444 (2010).
3. Deplazes, G. et al. Links between tropical rainfall and North Atlantic climate during the last glacial period. *Nat. Geosci.* **6**, 213-217 (2013).
4. Abreu, L., Shackleton, N. J., Schönfeld, J., Hall, M. & Chapman, M. Millennial-scale oceanic climate variability off the Western Iberian margin during the last two glacial periods. *Mar. Geol.* **196**, 1-20, doi:10.16/S0025-3227(03)00046-X (2003).
5. NGRIP members. High-resolution climate record of the northern hemisphere reaching into the last interglacial period. *Nature* **431**, 147–151 (2004).
